# Supplementary material for: New Functions of Arthropod Bursicon: Inducing Deposition and Thickening of New Cuticle and Hemocyte Granulation in the Blue Crab, Callinectes sapidus
Source: PubMed Central journal article supplement (PMC3460823; doi:10.1371/journal.pone.0046299), 2012-09-28
Supplement: pone.0046299.s006.pdf [file pone.0046299.s006.pdf]

Table S1. Primers for cloning, QRT-PCR assay and the expression of rCasBurs in *E. coli*

|                            | Primer sequences (5'-3')            |
|----------------------------|-------------------------------------|
| CasBurs $\alpha$ dF1       | CARTAYCCNGGNTGYRTNCC                |
| CasBurs $\alpha$ dF2       | TGYTG YCARGARWSNGGNGA               |
| CasBurs $\alpha$ dR1       | CACATRCANTCNAVNGGNGC                |
| CasBurs $\alpha$ 5R1       | GGCTCTCCGGGGCGCGGCTTG               |
| CasBurs $\alpha$ 5R2       | GCGCGGCTTGGGACAGTTGAGGGT            |
| CasBurs $\alpha$ 5R3 (=QR) | TGAAGTTAGCAATCTCCTGGGCA             |
| CasBurs $\alpha$ 3F1       | GAGGCGGCTATCACCTCAACTGTCC           |
| CasBurs $\alpha$ 3F2 (=QF) | CTATCACCTCAACTGTCCCAAGCCG           |
| CasBurs $\alpha$ NcoI      | ATCGCCATGGCCGACGAGTGTTCCCTGCGGCCTGT |
| CasBurs $\alpha$ EcoRI     | ATGAATTCTACTTCAGAAAGGGAACGCTGTC     |
| CasBurs $\beta$ dF1        | AARGANGARTAYGAYGARATNGG             |
| CasBurs $\beta$ dF2        | TGYAAYWSNCARGTNCANCC                |
| CasBurs $\beta$ dR1        | CCRCAYTTRWARCAYTYRCA                |
| CasBurs $\beta$ 5R1        | TTCCTGAGCTTCACCTGCTGGGT             |
| CasBurs $\beta$ 5R2 (=QR)  | CTGAGCTTCACCTGCTGGGTTGCC            |
| CasBurs $\beta$ 3F1        | CTCCGTCAACACTCCTTCAGGATT            |
| CasBurs $\beta$ 3F2 (=QF)  | TCAACACTCCTTCAGGATTCTCAA            |
| CasBurs $\beta$ NcoI       | ATCGCCATGGCCAGAACGTACGGTGTTGAATGCGA |
| CasBurs $\beta$ EcoRI      | ATGAATTCTTACCGGGTCGAGTCGCCACA       |
